# Supplementary material
Source: publisher figshare collection journal article supplement (https://tandf.figshare.com/ndownloader/files/21725853)

**First-principles perspectives on detection properties of sulfur mustard gas using novel electroresistive ε-Arsenene nanosheet device**

**R. Bhuvaneswari, J. Princy Maria, V. Nagarajan, R. Chandiramouli***

School of Electrical & Electronics Engineering

SASTRA Deemed University, Tirumalaisamudram, Thanjavur -613 401, India

**Supplementary information**

**
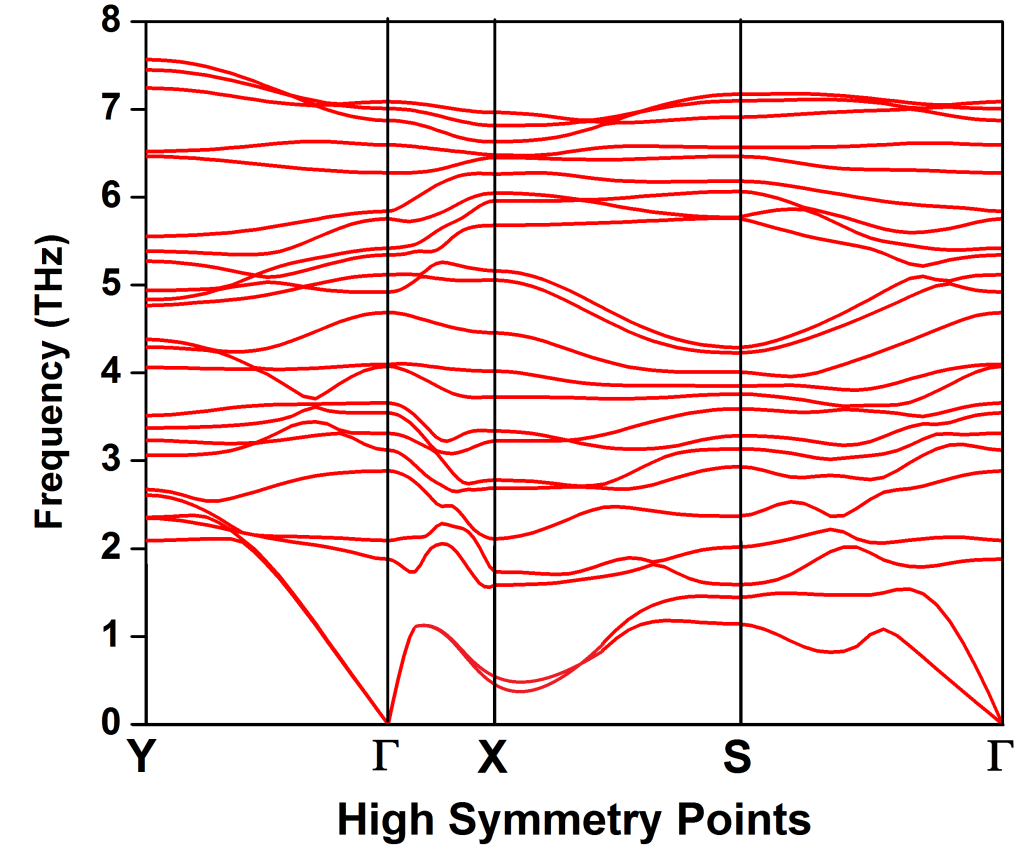
Fig. S1** Phonon-band-spectrum of pristine ε-As nanosheet.

**
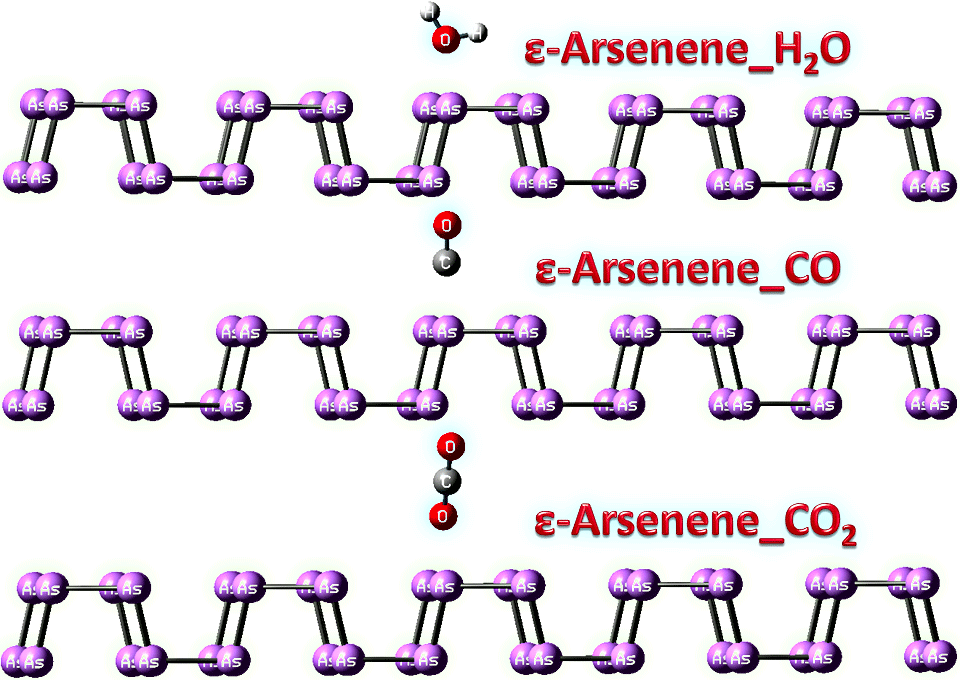
Fig. S2** Adsorption of H2O, CO and CO2 molecules on ε-As nanosheet.

**Fig. S3** Bands and PDOS maps - ε-As nanosheet_H2O.

**
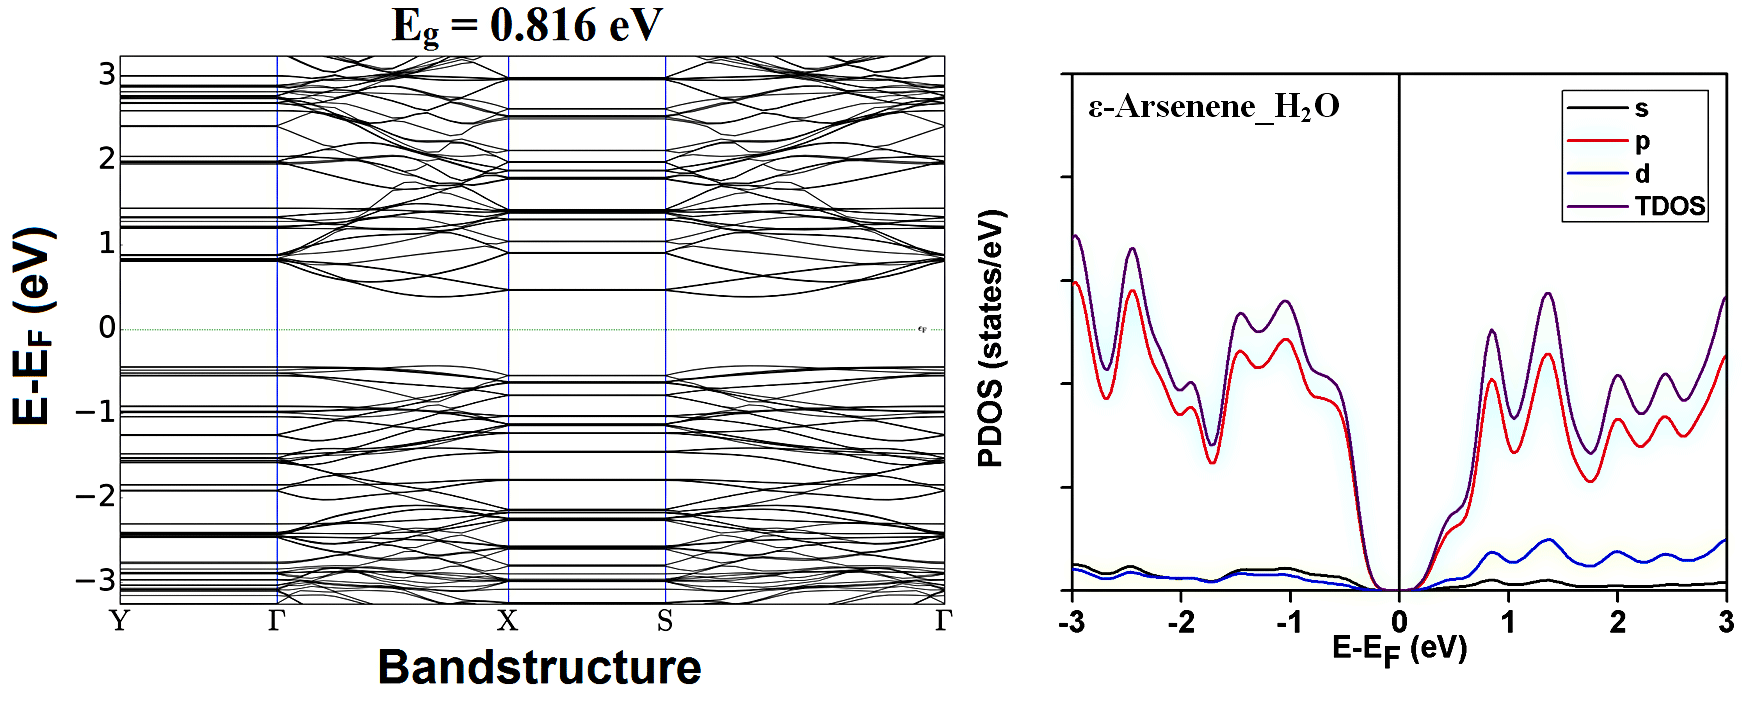
Fig. S4** Bands and PDOS maps - ε-As nanosheet_CO.

**
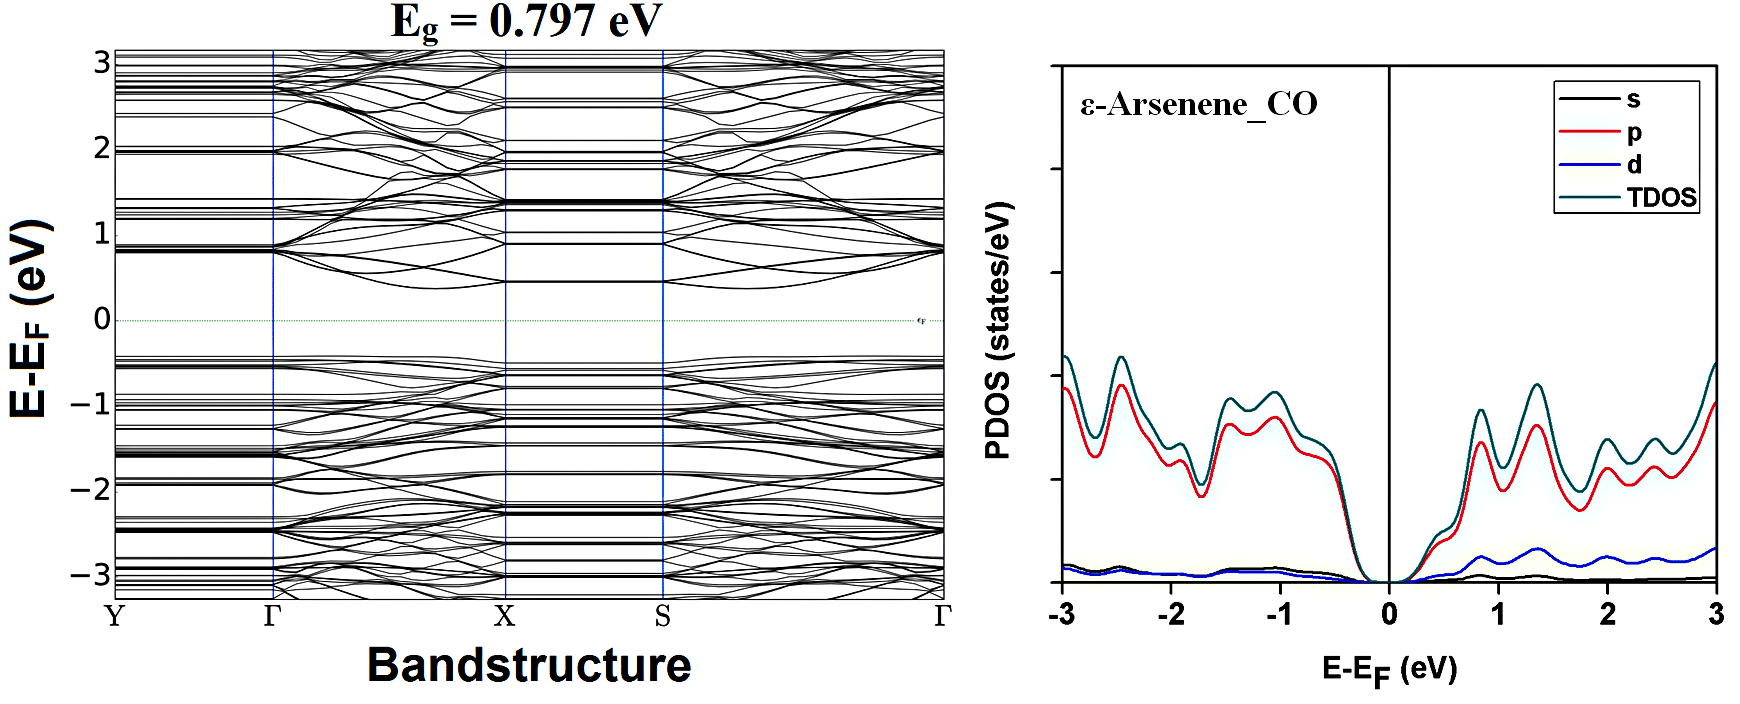
Fig. S5** Bands and PDOS maps - ε-As nanosheet_CO2.
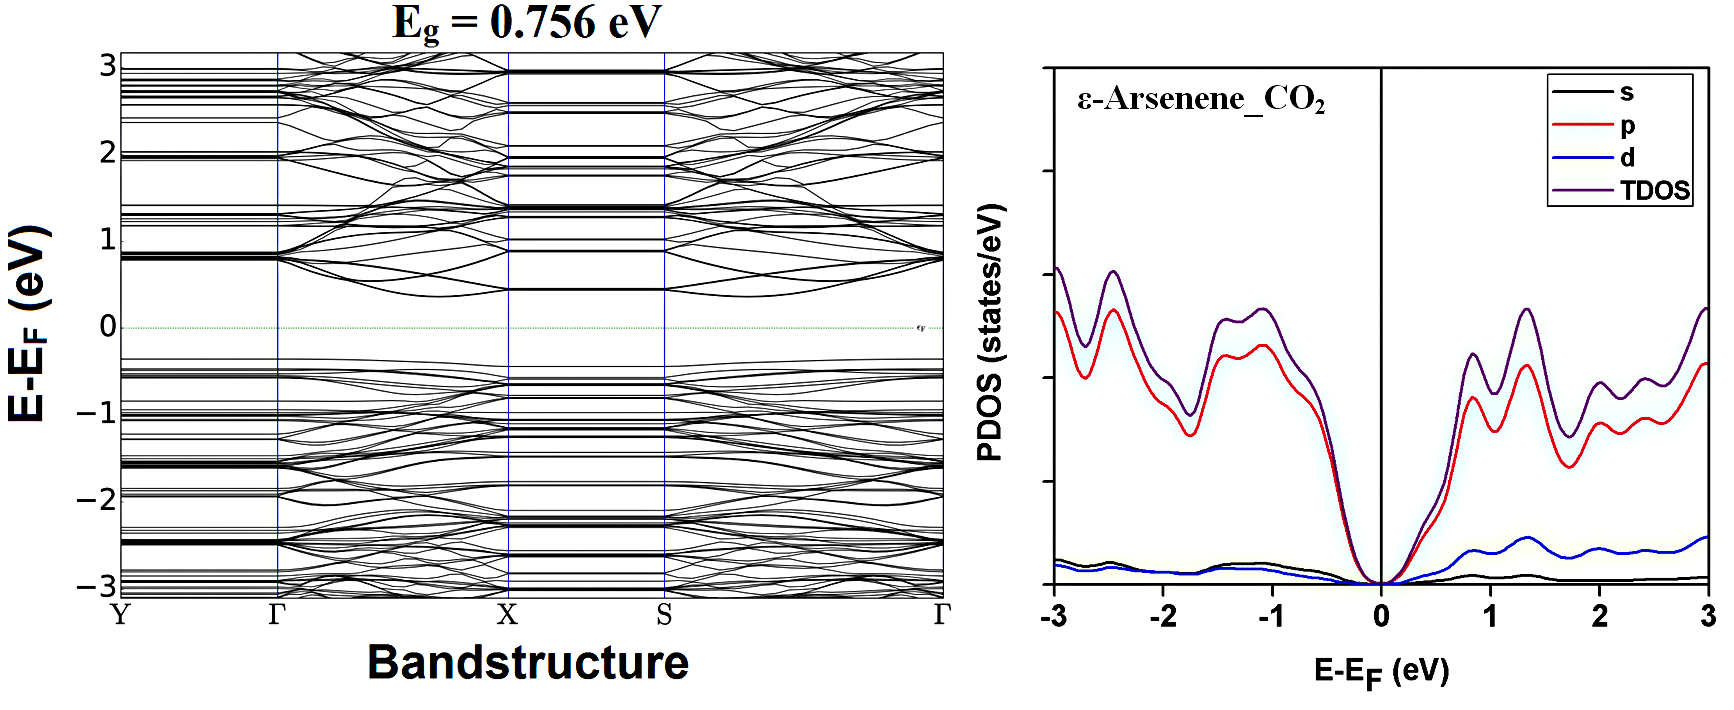

Supplement: Supplementary file 1 [file 21725853]
